# Supplementary material for: Surface activation by electron scavenger metal nanorod adsorption on TiH2, TiC, TiN, and Ti2O3
Source: Royal Society of Chemistry journal article supplement (doi:10.1039/d1cp02068d), 2021-01-01
Supplement: d1cp02068d1.pdf [file d1cp02068d1.pdf]

**Supporting information for**

**Surface activation by electron scavenger metal nanorod adsorption on TiH<sub>2</sub>, TiC, TiN, and Ti<sub>2</sub>O<sub>3</sub>**

Yoyo Hinuma<sup>1,2\*</sup>, Shinya Mine<sup>3</sup>, Takashi Toyao<sup>3,4</sup>, Zen Maeno<sup>3</sup>, and Ken-ichi Shimizu<sup>3,4</sup>

<sup>1</sup> Institute of Innovative Research, Tokyo Institute of Technology, 4259 Nagatsuta-cho, Midori-ku, Yokohama, 226-8502, Japan

<sup>2</sup> Department of Energy and Environment, National Institute of Advanced Industrial Science and Technology (AIST), 1-8-31, Midorigaoka, Ikeda 563-8577, Japan

<sup>3</sup> Institute for Catalysis, Hokkaido University, N-21, W-10, 1-5, Sapporo 001-0021, Japan

<sup>4</sup> Elements Strategy Initiative for Catalysts and Batteries, Kyoto University, Katsura, Kyoto 615-8520, Japan

\* [y.hinuma@aist.go.jp](mailto:y.hinuma@aist.go.jp)

**Table S1.** Information on thin and thick slab hydride models. Units: area in  $\text{\AA}^2$ , cell height and slab thickness in  $\text{\AA}$ ,  $E_{\text{surf}}$  in  $\text{meV}/\text{\AA}^2$ , and WF in eV.

| Compound         | Surface | Area | Cell height |       | Slab thickness |       | Number of atoms |       | $E_{\text{surf}}$ |       | WF   |       |
|------------------|---------|------|-------------|-------|----------------|-------|-----------------|-------|-------------------|-------|------|-------|
|                  |         |      | Thin        | Thick | Thin           | Thick | Thin            | Thick | Thin              | Thick | Thin | Thick |
| HfH <sub>2</sub> | (101)   | 9.5  | 29.5        | 29.5  | 16.1           | 18.8  | 18              | 21    | 101.6             | 101.7 | 3.86 | 3.84  |
| LaH <sub>3</sub> | (110)   | 21.4 | 29.2        | 29.2  | 15.6           | 17.5  | 32              | 36    | 55.5              | 56.6  | 2.05 | 2.04  |
| NbH <sub>2</sub> | (111)   | 8.9  | 28.8        | 31.4  | 15.7           | 18.3  | 18              | 21    | 88.0              | 86.8  | 4.35 | 4.42  |
| ScH <sub>2</sub> | (111)   | 9.7  | 30.0        | 30.0  | 16.4           | 19.1  | 18              | 21    | 65.3              | 65.4  | 3.50 | 3.56  |
| TiH <sub>2</sub> | (101)   | 8.3  | 27.7        | 30.3  | 15.1           | 17.7  | 18              | 21    | 99.5              | 99.6  | 4.30 | 4.29  |
| V <sub>2</sub> H | (111)   | 13.5 | 28.7        | 28.7  | 14.4           | 16.4  | 21              | 24    | 152.2             | 152.6 | 4.46 | 4.45  |
| VH <sub>2</sub>  | (111)   | 11.5 | 29.7        | 32.7  | 17.8           | 20.8  | 18              | 21    | 58.4              | 60.0  | 3.02 | 3.07  |
| YH <sub>3</sub>  | (001)   | 33.9 | 39.0        | 45.5  | 22.8           | 29.3  | 84              | 108   | 42.4              | 43.1  | 4.55 | 4.55  |
| ZrH <sub>2</sub> | (101)   | 9.8  | 27.3        | 32.8  | 16.4           | 19.1  | 18              | 21    | 97.0              | 97.3  | 3.89 | 3.86  |

**Table S2.** Information on thin and thick slab carbide models. Units: area in  $\text{\AA}^2$ , cell height and slab thickness in  $\text{\AA}$ ,  $E_{\text{surf}}$  in  $\text{meV}/\text{\AA}^2$ , and WF in eV.

| Compound                       | Surface          | Area | Cell height |       | Slab thickness |       | Number of atoms |       | $E_{\text{surf}}$ |       | WF   |       |
|--------------------------------|------------------|------|-------------|-------|----------------|-------|-----------------|-------|-------------------|-------|------|-------|
|                                |                  |      | Thin        | Thick | Thin           | Thick | Thin            | Thick | Thin              | Thick | Thin | Thick |
| HfC                            | (110)            | 10.6 | 30.0        | 30.0  | 16.1           | 18.4  | 14              | 16    | 122.2             | 121.2 | 4.36 | 4.29  |
| La <sub>2</sub> C <sub>3</sub> | (100)            | 75.7 | 30.5        | 30.5  | 15.2           | 17.4  | 70              | 80    | 71.7              | 71.3  | 2.40 | 2.34  |
| LaC <sub>2</sub>               | (110)            | 18.0 | 27.5        | 27.5  | 13.7           | 16.5  | 15              | 18    | 39.5              | 39.4  | 2.53 | 2.51  |
| Nb <sub>2</sub> C              | (10 $\bar{1}$ 1) | 17.6 | 28.5        | 28.5  | 14.2           | 16.6  | 18              | 21    | 157.8             | 157.4 | 4.40 | 4.39  |
| NbC                            | (100)            | 10.0 | 29.1        | 29.1  | 15.7           | 17.9  | 14              | 16    | 100.2             | 100.1 | 3.82 | 3.86  |
| Sc <sub>2</sub> C              | (0001)           | 9.4  | 32.9        | 32.9  | 16.5           | 22.0  | 9               | 12    | 66.0              | 65.6  | 3.74 | 3.74  |
| Ta <sub>2</sub> C              | (10 $\bar{1}$ 1) | 17.3 | 28.2        | 28.2  | 14.1           | 16.5  | 18              | 21    | 175.6             | 175.4 | 4.51 | 4.51  |
| TaC                            | (100)            | 9.9  | 28.9        | 28.9  | 15.5           | 17.8  | 14              | 16    | 112.2             | 110.7 | 3.70 | 3.80  |
| TiC                            | (100)            | 9.3  | 28.0        | 28.0  | 15.1           | 17.2  | 14              | 16    | 116.2             | 115.5 | 4.66 | 4.61  |
| V <sub>2</sub> C               | (111)            | 44.3 | 31.7        | 34.5  | 17.3           | 20.1  | 72              | 84    | 194.4             | 193.9 | 3.66 | 3.66  |
| Y <sub>2</sub> C               | (0001)           | 11.0 | 36.5        | 36.5  | 18.2           | 24.3  | 9               | 12    | 51.5              | 51.3  | 3.64 | 3.65  |
| YC <sub>2</sub>                | (110)            | 15.8 | 28.2        | 28.2  | 15.4           | 17.9  | 18              | 21    | 44.4              | 43.2  | 2.72 | 2.69  |
| ZrC                            | (100)            | 10.9 | 28.0        | 28.0  | 14.0           | 16.4  | 12              | 14    | 110.3             | 110.4 | 4.21 | 4.17  |

**Table S3.** Information on thin and thick slab nitride models. Units: area in  $\text{\AA}^2$ , cell height and slab thickness in  $\text{\AA}$ ,  $E_{\text{surf}}$  in  $\text{meV}/\text{\AA}^2$ , and WF in eV.

| Compound                       | Surface                | Area | Cell height |       | Slab thickness |       | Number of atoms |       | $E_{\text{surf}}$ |       | WF   |       |
|--------------------------------|------------------------|------|-------------|-------|----------------|-------|-----------------|-------|-------------------|-------|------|-------|
|                                |                        |      | Thin        | Thick | Thin           | Thick | Thin            | Thick | Thin              | Thick | Thin | Thick |
| HfN                            | (100)                  | 10.1 | 29.2        | 29.2  | 15.7           | 18.0  | 14              | 16    | 110.2             | 107.4 | 2.35 | 2.36  |
| LaN                            | (100)                  | 13.8 | 28.9        | 28.9  | 15.7           | 18.4  | 12              | 14    | 32.5              | 34.3  | 2.88 | 2.82  |
| Nb <sub>2</sub> N              | (11 $\bar{2}\bar{2}$ ) | 66.6 | 29.0        | 29.0  | 14.5           | 16.3  | 72              | 81    | 177.0             | 176.9 | 3.59 | 3.59  |
| Nb <sub>4</sub> N <sub>3</sub> | (100)                  | 37.9 | 28.5        | 28.5  | 15.4           | 17.6  | 49              | 56    | 111.0             | 111.0 | 3.27 | 3.27  |
| NbN                            | (11 $\bar{2}$ 0)       | 14.7 | 28.0        | 28.0  | 14.8           | 16.2  | 20              | 22    | 198.7             | 198.9 | 4.20 | 4.20  |
| NbN                            | (11 $\bar{2}$ 2)       | 21.1 | 27.8        | 27.8  | 15.4           | 16.5  | 30              | 32    | 196.5             | 196.5 | 3.06 | 3.06  |
| ScN                            | (100)                  | 9.9  | 29.0        | 29.0  | 15.6           | 17.8  | 14              | 16    | 86.3              | 86.4  | 3.61 | 3.62  |
| Ta <sub>2</sub> N              | (11 $\bar{2}\bar{2}$ ) | 65.6 | 28.7        | 28.7  | 14.4           | 16.2  | 72              | 81    | 193.6             | 193.7 | 3.76 | 3.75  |
| Ti <sub>2</sub> N              | (110)                  | 20.9 | 31.3        | 34.7  | 17.4           | 20.8  | 30              | 36    | 164.7             | 164.5 | 3.61 | 3.61  |
| TiN                            | (100)                  | 8.9  | 29.5        | 29.5  | 14.8           | 16.9  | 14              | 16    | 96.0              | 95.4  | 3.01 | 3.03  |
| VN                             | (100)                  | 8.3  | 28.6        | 28.6  | 14.3           | 16.3  | 14              | 16    | 62.5              | 52.2  | 4.00 | 4.07  |
| YN                             | (100)                  | 11.8 | 29.1        | 29.1  | 14.6           | 17.0  | 12              | 14    | 70.1              | 70.0  | 3.23 | 3.24  |
| ZrN                            | (100)                  | 10.4 | 29.6        | 29.6  | 15.9           | 18.2  | 14              | 16    | 100.1             | 97.7  | 2.37 | 2.37  |

**Table S4.** Information on thin and thick slab oxide models. Units: area in  $\text{\AA}^2$ , cell height and slab thickness in  $\text{\AA}$ ,  $E_{\text{surf}}$  in  $\text{meV}/\text{\AA}^2$ , and WF in eV.

| Compound                                 | Surface                   | Area  | Cell height |       | Slab thickness |       | Number of atoms |       | $E_{\text{surf}}$ |       | WF   |       |
|------------------------------------------|---------------------------|-------|-------------|-------|----------------|-------|-----------------|-------|-------------------|-------|------|-------|
|                                          |                           |       | Thin        | Thick | Thin           | Thick | Thin            | Thick | Thin              | Thick | Thin | Thick |
| HfO <sub>2</sub>                         | (11 $\bar{1}$ )           | 43.2  | 28.2        | 31.3  | 15.7           | 18.8  | 60              | 72    | 68.9              | 67.3  | 6.33 | 6.35  |
| $\alpha$ -La <sub>2</sub> O <sub>3</sub> | (111)                     | 220.2 | 29.3        | 32.5  | 16.3           | 19.5  | 200             | 240   | 40.0              | 39.3  | 4.51 | 4.52  |
| $\beta$ -La <sub>2</sub> O <sub>3</sub>  | (0001)                    | 13.2  | 36.2        | 42.2  | 24.1           | 30.2  | 20              | 25    | 41.6              | 40.1  | 5.27 | 5.24  |
| $\beta$ -La <sub>2</sub> O <sub>3</sub>  | (10 $\bar{1}$ 1)          | 27.0  | 32.5        | 35.4  | 17.7           | 20.7  | 30              | 35    | 39.6              | 38.8  | 4.68 | 4.68  |
| Nb <sub>2</sub> O <sub>5</sub>           | (111)                     | 51.3  | 30.1        | 33.5  | 16.7           | 20.1  | 70              | 84    | 37.6              | 36.3  | 7.13 | 7.11  |
| NbO                                      | (110)                     | 25.2  | 29.8        | 32.8  | 16.9           | 19.9  | 34              | 40    | 138.8             | 137.5 | 3.75 | 3.73  |
| NbO                                      | (211)                     | 43.6  | 27.6        | 31.0  | 16.1           | 17.8  | 56              | 62    | 139.3             | 139.4 | 3.83 | 3.84  |
| NbO <sub>2</sub>                         | (110)                     | 20.4  | 31.6        | 35.1  | 17.5           | 21.0  | 30              | 36    | 53.4              | 48.8  | 4.25 | 4.33  |
| ScO                                      | (100)                     | 9.7   | 28.6        | 28.6  | 15.4           | 17.6  | 14              | 16    | 58.7              | 57.6  | 2.00 | 1.97  |
| Sc <sub>2</sub> O <sub>3</sub>           | (111)                     | 165.1 | 31          | 33.8  | 16.9           | 19.7  | 240             | 280   | 60.0              | 58.7  | 5.95 | 5.96  |
| Ta <sub>2</sub> O <sub>5</sub>           | (111)                     | 50.4  | 29.9        | 33.2  | 16.6           | 19.9  | 70              | 84    | 46.6              | 44.9  | 6.92 | 6.87  |
| Ti <sub>3</sub> O                        | (10 $\bar{1}$ 0)          | 47.7  | 30.9        | 35.3  | 17.6           | 22.0  | 64              | 80    | 143.3             | 142.4 | 3.21 | 3.21  |
| Ti <sub>2</sub> O                        | (10 $\bar{1}$ $\bar{1}$ ) | 15.8  | 29.2        | 29.2  | 15.7           | 18.0  | 21              | 24    | 109.1             | 108.2 | 3.58 | 3.57  |
| Ti <sub>3</sub> O <sub>2</sub>           | (11 $\bar{2}$ 3)          | 48.6  | 29.3        | 31.5  | 15.8           | 18.0  | 70              | 80    | 108.3             | 107.5 | 3.66 | 3.67  |
| Ti <sub>2</sub> O <sub>3</sub>           | (01 $\bar{1}$ 2)          | 27.8  | 33.4        | 37.1  | 18.5           | 22.3  | 50              | 60    | 64.8              | 62.6  | 3.26 | 3.26  |
| Rutile-TiO <sub>2</sub>                  | (110)                     | 19.2  | 29.4        | 32.6  | 16.3           | 19.6  | 30              | 36    | 37.9              | 29.5  | 7.19 | 7.25  |
| Anatase-TiO <sub>2</sub>                 | (101)                     | 19.5  | 31.8        | 35.3  | 17.6           | 21.2  | 30              | 36    | 31.7              | 30.1  | 7.25 | 7.25  |
| V <sub>2</sub> O <sub>5</sub>            | (001)                     | 41.2  | 29.4        | 33.7  | 16.8           | 21.0  | 56              | 70    | 0.2               | -1.3  | 8.40 | 8.33  |
| Y <sub>2</sub> O <sub>3</sub>            | (111)                     | 192.4 | 27.4        | 30.4  | 15.2           | 18.3  | 200             | 240   | 57.8              | 56.7  | 5.27 | 5.23  |
| ZrO <sub>2</sub>                         | (11 $\bar{1}$ )           | 44.2  | 28.5        | 31.6  | 15.8           | 19.0  | 60              | 72    | 59.8              | 58.2  | 6.38 | 6.34  |

**Table S5.** Information on thin and thick slab sulfide models. Units: area in  $\text{\AA}^2$ , cell height and slab thickness in  $\text{\AA}$ ,  $E_{\text{surf}}$  in  $\text{meV}/\text{\AA}^2$ , and WF in eV.

| Compound                       | Surface          | Area | Cell height |       | Slab thickness |       | Number of atoms |       | $E_{\text{surf}}$ |       | WF   |       |
|--------------------------------|------------------|------|-------------|-------|----------------|-------|-----------------|-------|-------------------|-------|------|-------|
|                                |                  |      | Thin        | Thick | Thin           | Thick | Thin            | Thick | Thin              | Thick | Thin | Thick |
| Hf <sub>2</sub> S              | (0001)           | 9.6  | 58.3        | 70.0  | 40.8           | 52.5  | 21              | 27    | 154.5             | 154.5 | 4.38 | 4.39  |
| HfS <sub>2</sub>               | (0001)           | 11.1 | 35.7        | 35.7  | 17.8           | 23.8  | 9               | 12    | 1.6               | 1.5   | 6.00 | 5.98  |
| HfS <sub>3</sub>               | (001)            | 18.0 | 54.0        | 63.0  | 36.0           | 45.0  | 32              | 40    | 1.8               | 1.8   | 5.62 | 5.56  |
| LaS                            | (100)            | 16.8 | 29.0        | 29.0  | 14.5           | 17.4  | 10              | 12    | 39.4              | 40.0  | 2.28 | 2.16  |
| Nb <sub>3</sub> S <sub>4</sub> | (12 $\bar{3}$ 0) | 85.0 | 28.2        | 31.3  | 15.7           | 18.8  | 70              | 84    | 64.3              | 69.2  | 5.04 | 4.92  |
| NbS <sub>3</sub>               | (10 $\bar{1}$ )  | 49.0 | 54.7        | 63.8  | 36.4           | 45.6  | 96              | 120   | 2.6               | 2.6   | 5.01 | 5.01  |
| ScS                            | (100)            | 13.2 | 28.3        | 28.3  | 15.4           | 18.0  | 12              | 14    | 40                | 41.7  | 2.96 | 2.95  |
| TiS                            | (10 $\bar{1}$ 0) | 20.6 | 30.6        | 33.4  | 16.7           | 19.5  | 24              | 28    | 81.8              | 82.2  | 4.04 | 4.03  |
| TiS <sub>2</sub>               | (0001)           | 9.7  | 39.3        | 45.0  | 22.5           | 28.1  | 12              | 15    | 3.6               | 3.6   | 5.84 | 5.84  |
| TiS <sub>3</sub>               | (001)            | 16.5 | 52.7        | 61.4  | 35.1           | 43.9  | 32              | 40    | 2.2               | 2.2   | 5.26 | 5.26  |
| V <sub>3</sub> S               | (110)            | 59.8 | 39.0        | 45.5  | 26.0           | 32.5  | 128             | 160   | 118.3             | 118.1 | 3.46 | 3.46  |
| V <sub>5</sub> S <sub>4</sub>  | (110)            | 19.5 | 37.6        | 43.8  | 25.1           | 31.3  | 36              | 45    | 63.7              | 63.4  | 3.67 | 3.68  |
| VS                             | (101)            | 25.7 | 28.4        | 32.5  | 16.2           | 20.3  | 32              | 40    | 58.4              | 58.4  | 4.13 | 4.13  |
| VS <sub>4</sub>                | (11 $\bar{1}$ )  | 73.2 | 39.9        | 45.6  | 22.8           | 28.5  | 80              | 100   | 2.0               | 2.0   | 4.33 | 4.32  |
| VS <sub>4</sub>                | (010)            | 80.4 | 36.3        | 41.5  | 20.8           | 26.0  | 80              | 100   | 2.1               | 2.0   | 4.18 | 4.16  |
| YS                             | (100)            | 14.9 | 27.3        | 27.3  | 13.6           | 16.4  | 10              | 12    | 39.5              | 40.1  | 2.46 | 2.37  |
| Y <sub>5</sub> S <sub>7</sub>  | (10 $\bar{1}$ )  | 55.6 | 33.3        | 38.1  | 19.0           | 23.8  | 48              | 60    | 57.2              | 57.5  | 3.85 | 3.82  |
| ZrS                            | (001)            | 12.8 | 37.9        | 43.3  | 21.7           | 27.1  | 16              | 20    | 25.7              | 25.8  | 3.43 | 3.41  |
| ZrS <sub>2</sub>               | (0001)           | 11.4 | 35.4        | 35.4  | 17.7           | 23.6  | 9               | 12    | 1.9               | 1.9   | 6.02 | 6.02  |
| ZrS <sub>3</sub>               | (001)            | 18.3 | 54.0        | 63.0  | 36.0           | 45.0  | 32              | 40    | 1.9               | 1.9   | 5.61 | 5.64  |

**Table S6.** Comparison of calculated (PBEsol) and experimentally obtained work functions of elementary metals. The unit is eV. The experimental values are from Derry et al., Journal of Vacuum Science & Technology A 33, 060801 (2015). The mean error is -0.12 eV. The experimental value for Ru shown with \* is for the (100) surface in Table I of Derry et al. However, this value appears to be for the (001) surface based on individual values cited in Table II of Derry et al.

| Metal | Crystal | Surface          | Calculation | Experiment | Difference |
|-------|---------|------------------|-------------|------------|------------|
| Al    | fcc     | (111)            | 4.06        | 4.32±0.05  | -0.26      |
| Zn    | hcp     | (0001)           | 4.31        |            |            |
| Ag    | fcc     | (111)            | 4.56        | 4.53±0.07  | 0.03       |
| Co    | hcp     | (1 $\bar{1}$ 00) | 4.84        |            |            |
| Fe    | bcc     | (110)            | 4.93        | 5.07±0.04  | -0.14      |
| Cu    | fcc     | (111)            | 4.94        | 4.90±0.02  | 0.04       |
| Re    | hcp     | (0001)           | 5.07        |            |            |
| Ru    | hcp     | (0001)           | 5.13        | 5.40±0.11* | -0.27      |
| Ni    | fcc     | (111)            | 5.22        | 5.24±0.07  | -0.02      |
| Au    | fcc     | (111)            | 5.28        | 5.33±0.06  | -0.05      |
| Rh    | fcc     | (111)            | 5.29        | 5.46±0.09  | -0.17      |
| Pd    | fcc     | (111)            | 5.38        | 5.67±0.12  | -0.29      |
| Ir    | fcc     | (111)            | 5.64        | 5.78±0.04  | -0.14      |
| Pt    | fcc     | (111)            | 5.84        | 5.91±0.08  | -0.07      |

**Table S7.**  $E_{\text{Hvac}}$ ,  $E_{\text{bulk}}$ , and WF for hydrides plotted in Fig. 6.

|                  | $E_{\text{Hvac}}$ (eV/defect) | $E_{\text{bulk}}$ (eV/atom) | WF (eV) |
|------------------|-------------------------------|-----------------------------|---------|
| ScH <sub>2</sub> | 1.45                          | -0.75                       | 3.54    |
| YH <sub>2</sub>  | 1.45                          | -0.79                       | 3.02    |
| LaH <sub>2</sub> | 1.39                          | -0.68                       | 2.66    |
| TiH <sub>2</sub> | 1.50                          | -0.58                       | 4.29    |
| ZrH <sub>2</sub> | 1.60                          | -0.67                       | 3.89    |
| HfH <sub>2</sub> | 1.51                          | -0.60                       | 3.85    |
| VH <sub>2</sub>  | 1.44                          | -0.30                       | 4.70    |
| NbH <sub>2</sub> | 1.51                          | -0.33                       | 4.42    |
| TaH <sub>2</sub> | 1.32                          | -0.19                       | 4.25    |

**Table S8.**  $E_{\text{Cvac}}$ ,  $E_{\text{bulk}}$ , and WF for carbides plotted in Fig. 6.

|     | $E_{\text{Cvac}}$ (eV/defect) | $E_{\text{bulk}}$ (eV/atom) | WF (eV) |
|-----|-------------------------------|-----------------------------|---------|
| TiC | 0.69                          | -0.85                       | 4.66    |
| ZrC | 0.71                          | -0.92                       | 4.17    |
| HfC | 1.09                          | -1.03                       | 4.36    |
| VC  | -0.43                         | -0.48                       | 4.36    |
| NbC | -0.24                         | -0.54                       | 3.82    |
| TaC | 0.35                          | -0.66                       | 3.99    |



**Table S9.**  $E_{\text{Nvac}}$ ,  $E_{\text{bulk}}$ , and WF for nitrides plotted in Fig. 6.

|     | $E_{\text{Nvac}}$ (eV/defect) | $E_{\text{bulk}}$ (eV/atom) | WF (eV) |
|-----|-------------------------------|-----------------------------|---------|
| ScN | 2.86                          | -2.13                       | 3.61    |
| YN  | 2.70                          | -1.89                       | 3.24    |
| LaN | 1.29                          | -1.41                       | 2.82    |
| TiN | 2.83                          | -1.89                       | 3.01    |
| ZrN | 3.49                          | -1.97                       | 2.37    |
| HfN | 3.83                          | -2.01                       | 2.35    |
| VN  | 1.15                          | -1.16                       | 4.00    |
| NbN | 1.31                          | -1.07                       | 3.35    |
| TaN | 1.62                          | -1.08                       | 3.09    |

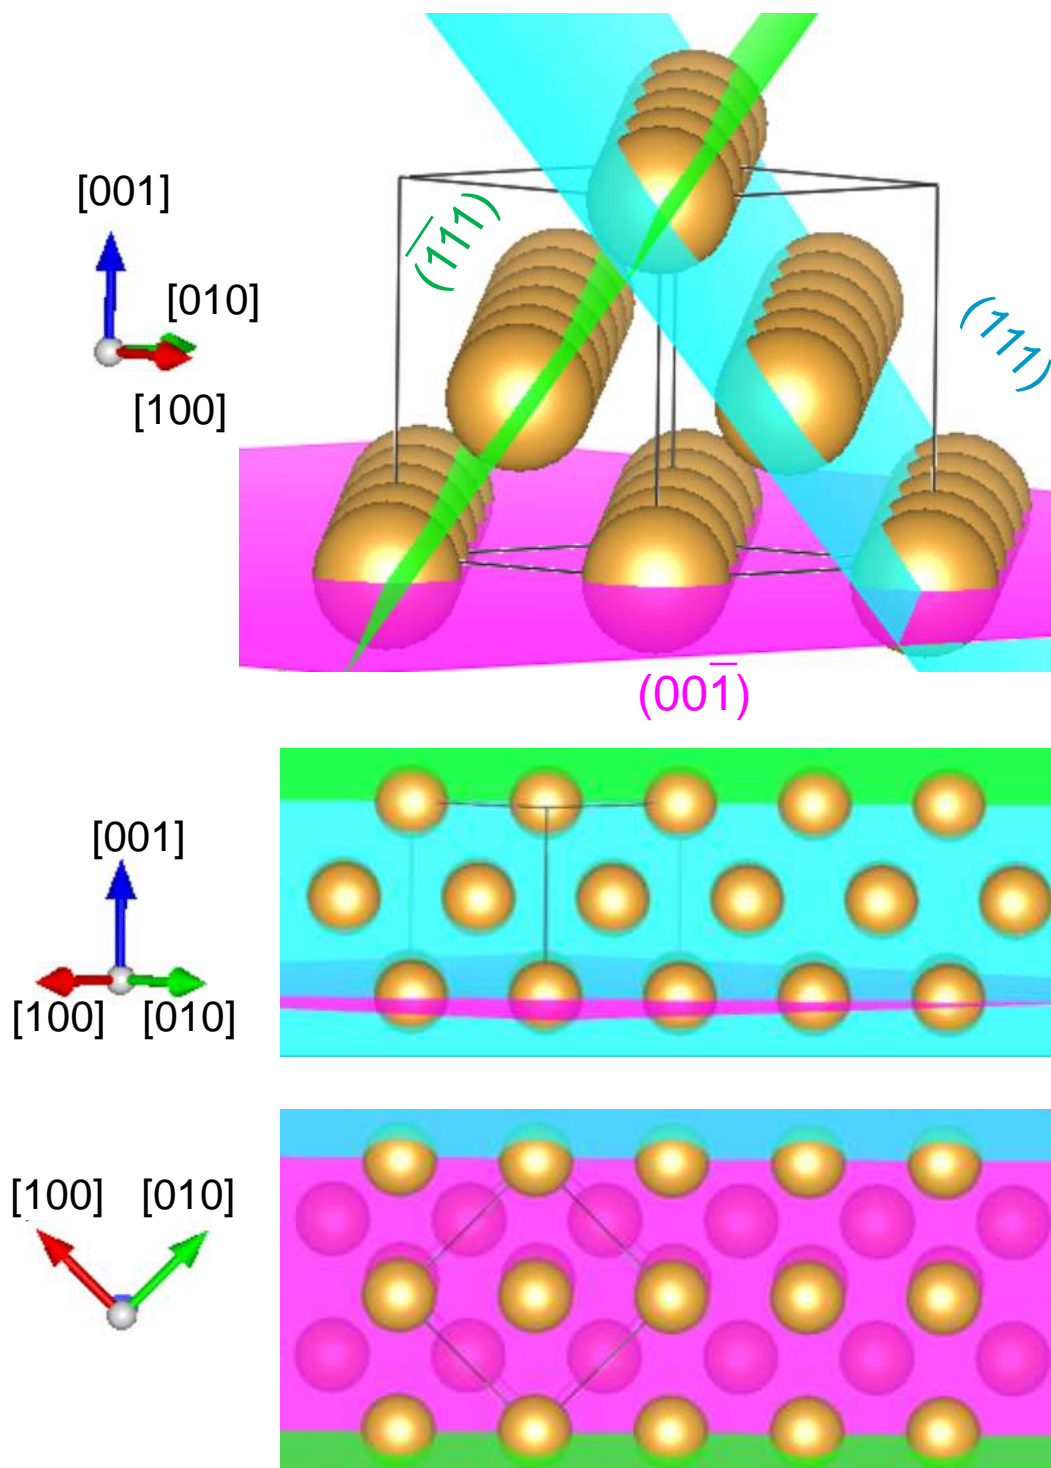

**Fig. S1.** Nanorod of a face-centered cubic metal viewed from three directions.

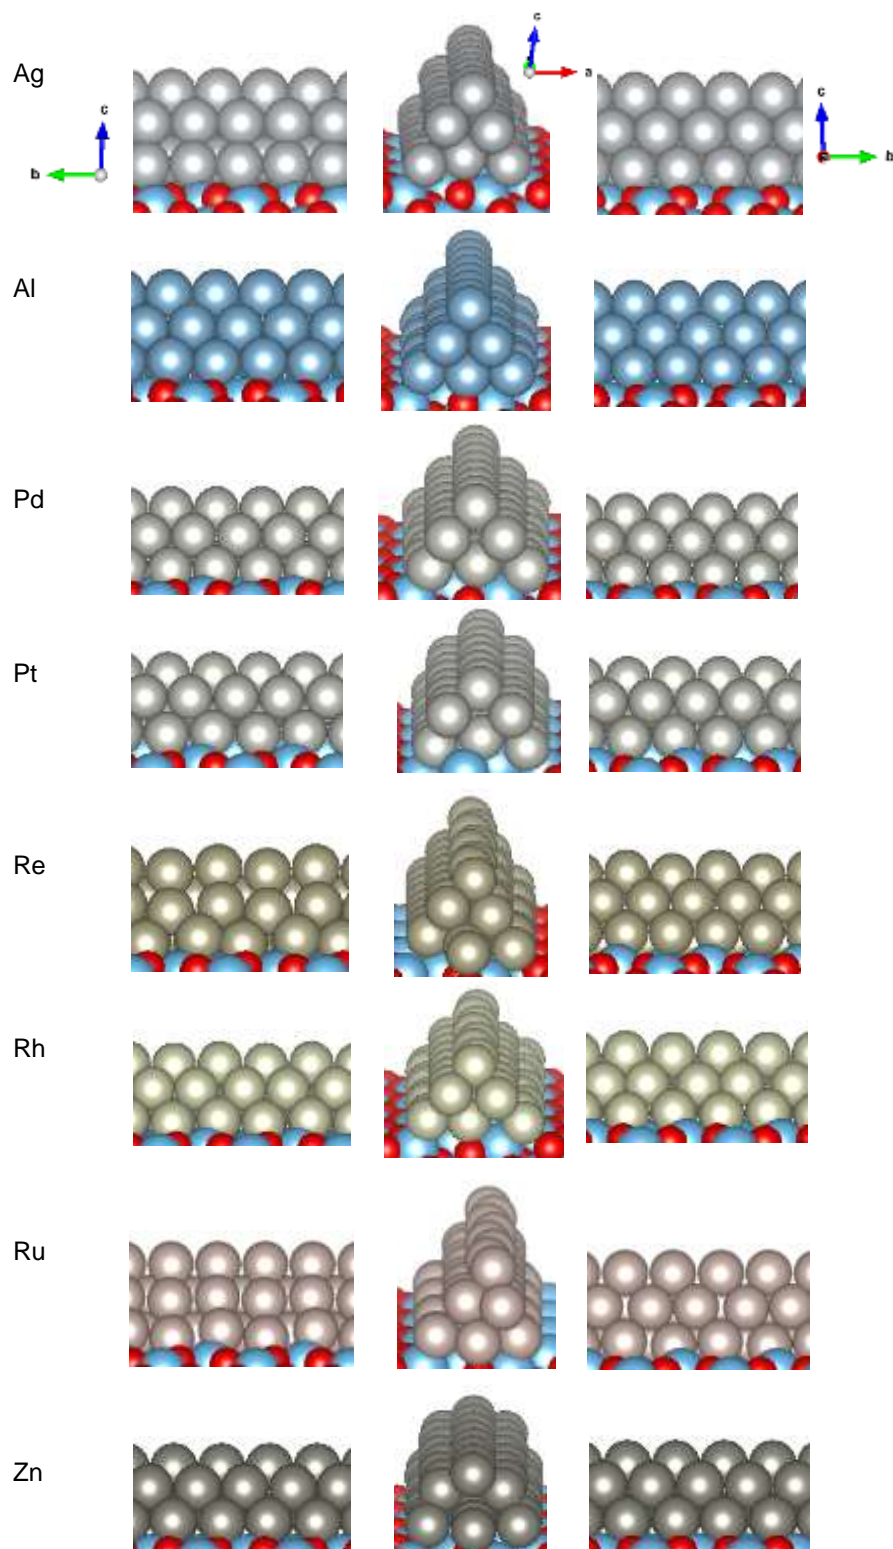

**Fig. S2.** Adsorption of a nanorod of a face-centered cubic metal on the  $\text{Ti}_2\text{O}_3$  (01  $\bar{1}$  2) surface, as viewed from three directions.
